# Supplementary material
Source: Elsevier journal article supplement (https://www.sciencedirect.com/science/article/pii/S2659663621000199)
Supplement: mmc2 [file S2659663621000199:mmc2.pdf]

**Puntos claves:** Falta formación a los neumólogos en rehabilitación pulmonar en Fibrosis Pulmonar Idiopática (FPI).

- La mayoría de los neumólogos no derivan a rehabilitación respiratoria a los pacientes con FPI.
- Necesidad de mejorar la integración del rehabilitador/fisioterapeuta en el equipo de neumología para el mejor manejo multidisciplinar de los pacientes con FPI.
- Déficit de rehabilitadores y fisioterapeutas en los servicios de neumología.
- La rehabilitación respiratoria es efectiva y segura en la FPI.
